# Supplementary material
Source: ML conference proceedings conference paper supplement (https://openaccess.thecvf.com/content/CVPR2025/html/Yang_ImViD_Immersive_Volumetric_CVPR_2025_paper.html)
Supplement: Supplementary file 1 [file Yang_ImViD_Immersive_Volumetric_CVPR_2025_supplemental.zip]

# ImViD: Immersive Volumetric Videos for Enhanced VR Engagement

## Supplementary Material

### A. Overview

Within the supplementary material, we provide:

- A more detailed introduction and analysis of existing datasets for Dynamic Novel View Synthesis (NVS) tasks in Appendix B.
- More benchmark results and discussion in Appendix C.
- Additional experiments details and STG++ implement details in Appendix D.
- Some clarifications and more descriptions of technical details regarding capture rig in Appendix E.
- Real-time immersive volumetric video demos and other dynamic scene reconstruction results are in our video. Please refer to the attached .mp4 file.

### B. Comprehensive Summary of Datasets for Dynamic Novel View Synthesis Tasks

The earliest studies on dynamic reconstruction have naturally focused on human digital avatars. Datasets such as Human3.6M [18], Panoptic Sports [19], ZJ-Mocap [44], and Tensor4D [48] primarily focus on depicting simple human actions but do not include backgrounds, which is crucial to the immersive application experiences. We will introduce more complex datasets that include environments from monocular based and multi-view based.

Monocular acquisition systems are popular due to their low cost and ease of construction. Datasets such as HyperNeRF [43], Dynamic Scene Dataset [60], and D2NeRF [56] use a mobile phone as devices, capturing dynamic scenes by waving the phone. However, these datasets suffer from resolutions below 1080p, limited capture space (similar to fixed-point shooting), and durations under one minute. Although NeRF On-the-go [45] allows for larger capture ranges by walking while shooting, high-quality reconstructions are confined to the vicinity of the capture path, and the small field of view (FOV) limits prolonged observations of specific scene positions.

Multi-camera data collection has gained significant attention due to its ability to provide a larger FOV and richer details. For instance, the Immersive Light Field dataset [6] employs 46 cameras to capture 15 indoor and outdoor scenes, while Technicolor [46] uses a 4x4 camera rig for 12 indoor sequences. The UCSD Dynamic Scene Dataset [34] consists of 96 outdoor videos focused on single-person activities captured by 10 cameras. The Plenoptic Dataset [28] uses 21 cameras for 6 indoor scenes. Similarly, datasets like [27, 33, 54] utilize 13, 18, and 24 cameras, respectively, to capture dynamic scenes. However, all these setups remain static during capture, limiting them to frontal views

and hindering 360° reconstruction. Additionally, the video sequences are typically short, with a maximum duration of 2 minutes (often less than 30 seconds) and a maximum resolution of 3840x2160, which is insufficient for immersive VR experiences.

Moreover, the previously mentioned datasets, whether monocular or multi-view, lack sound recordings, despite the importance of multimodality for immersion. The Replay dataset [49] addresses this by focusing on long sequences with professional actors in familiar settings. It employs a ring of 8 static DSLR cameras paired with binaural microphones and 3 head-mounted GoPro cameras, providing 46 videos at 4K. However, aside from the head-mounted cameras, which can rotate slightly with head movements, all other cameras remain static. Furthermore, the DSLR arrangement does not align with human viewing habits in VR, making them unsuitable as benchmarks for novel view synthesis tasks. The latest work [9] presents a dataset of 28 scenes captured with a 360° camera, each including multiple audio and video sequences. However, this dataset is constrained by a fixed-point shooting strategy, resulting in sparse viewpoints that hinder the reconstruction of high-quality dynamic scenes. Further comparisons between our work and these datasets can be found in Tab. 8.

### C. More Benchmark Results and Analysis

For fair evaluation, all of our experiments use the default parameters recommended by these works.

#### C.1. Quantitative & Qualitative Results

**Quantitative Results.** Table 6 is an extension of Table 5. Table 7 displays the train view performance of baselines and STG++ on each 60-frame segment across different scenes.

**Qualitative Results.** Figure 8 shows the results of the test view, while Figure 9 presents more results of the train view. Here, we also include a comparison with the latest work Ex4DGS\*, whose code was released shortly before our submission, limiting our ability to investigate thoroughly. Figure 10 presents the Ex4DGS's results from the same viewpoints as Figure 5 showed in the main text. It performs slightly worse in the challenging motion area due to incomplete dynamic and static partitioning.

#### C.2. Analysis

4DGS proposes a two-stage training approach. In the first stage, the algorithm initializes a static scene using the 0th

\*Lee J et al. Fully Explicit Dynamic Gaussian Splatting. Advances in Neural Information Processing Systems, 2024, 37: 5384-5409.

| GT                                                                                | 4DGS                                                                              | 4Drotor                                                                           | STG                                                                                | STG++                                                                               |
|-----------------------------------------------------------------------------------|-----------------------------------------------------------------------------------|-----------------------------------------------------------------------------------|------------------------------------------------------------------------------------|-------------------------------------------------------------------------------------|
|  |  |  |  |  |
|                                                                                   | PSNR: 23.198 SSIM: 0.754 LPIPS:0.409                                              | PSNR: 27.118 SSIM: 0.773 LPIPS:0.352                                              | PSNR: 28.319 SSIM: 0.779 LPIPS:0.305                                               | PSNR: 31.030 SSIM: 0.792 LPIPS:0.295                                                |
|  |  |  |  |  |
|                                                                                   | PSNR: 26.004 SSIM: 0.891 LPIPS:0.172                                              | PSNR: 24.239 SSIM: 0.892 LPIPS:0.109                                              | PSNR: 27.004 SSIM: 0.910 LPIPS:0.115                                               | PSNR: 27.990 SSIM: 0.916 LPIPS:0.111                                                |
|  |  |  |  |  |
|                                                                                   | PSNR: 26.680 SSIM: 0.844 LPIPS:0.354                                              | PSNR: 22.802 SSIM: 0.841 LPIPS:0.332                                              | PSNR: 24.055 SSIM: 0.847 LPIPS:0.319                                               | PSNR: 25.725 SSIM: 0.829 LPIPS:0.316                                                |
|  |  |  |  |  |
|                                                                                   | PSNR: 18.241 SSIM: 0.222 LPIPS:0.708                                              | PSNR: 18.013 SSIM: 0.302 LPIPS:0.274                                              | PSNR: 20.447 SSIM: 0.568 LPIPS:0.218                                               | PSNR: 20.314 SSIM: 0.569 LPIPS:0.213                                                |

Figure 8. Test view results of three baselines and STG++ on Scene1, Scene2, Scene5, Scene6.

frame and limits the number of final points. It maintains the number and color attributes of the Gaussians while only predicting changes in their positions, rotations, and scaling. This results in minimal model storage, leading to better performance in the static parts of the scene compared to other baselines, with reduced flickering. However, its performance declines significantly in scenes requiring more points for detailed representation, and it cannot address the floaters caused by inconsistent colors in adjacent views. The fitting of larger and faster motions and suddenly-appear/disappear objects is particularly poor.

4Drotor uses dense point clouds as input, which increases memory requirements, especially in large scenes, leading to longer training times and a higher risk of memory overflow. However, by introducing rotors to extend 3D Gaussians to 4D, the authors can directly adapt the density control strategy of the original 3DGS to the t-dimensional space. Consequently, it may perform better in areas with significant motion, such as Figure 9 *Scene2 Laboratory* around human hands.

## D. STG++ (Color Mapping) Details

Although STG is not the smallest in terms of storage among all baselines and cannot directly train a model with 300 frames (requiring splitting into multiple 60-frame segments), it achieves better results under the train-views com-

pared to other baselines. Therefore, we delve deeper into its study, hoping it can serve as the foundational architecture for our initial implementation of immersive volumetric video. However, when viewing in SIBR\_Viewer, we notice two significant drawbacks:

1) In each 60-frame segment, when the viewpoint changes, there is a noticeable flickering of scene points and the presence of floaters, especially when the ground truth of the train-views shows significant color differences due to lighting occlusions and other objective reasons.

2) Besides the color inconsistency during viewpoint changes within each segment, when we modify SIBR\_Viewer to continuously load multiple segments, the transitions between segments become even more abrupt. This is a drawback of segmented training, as the appearance of the Gaussians cannot remain consistent between segments.

Thus, we propose a learnable viewpoint-dependent affine color transformation function  $\phi_i(W, T)$  and maintain its values across different segments. Here,  $i$  is the index of the camera,  $W$  is a  $3 \times 3$  transformation matrix, and  $T$  is a  $(1, 3)$  offset vector. Just like the affine transformation, the colors in rendered images  $C'_i$  are related to the colors in real scenes (SIBR\_Viewer)  $C_i$  as follows:

$$C'_i = \mathbf{W} \cdot C_i + \mathbf{T} \quad (13)$$

The loss is calculated between the rendered images  $C'_i$  and

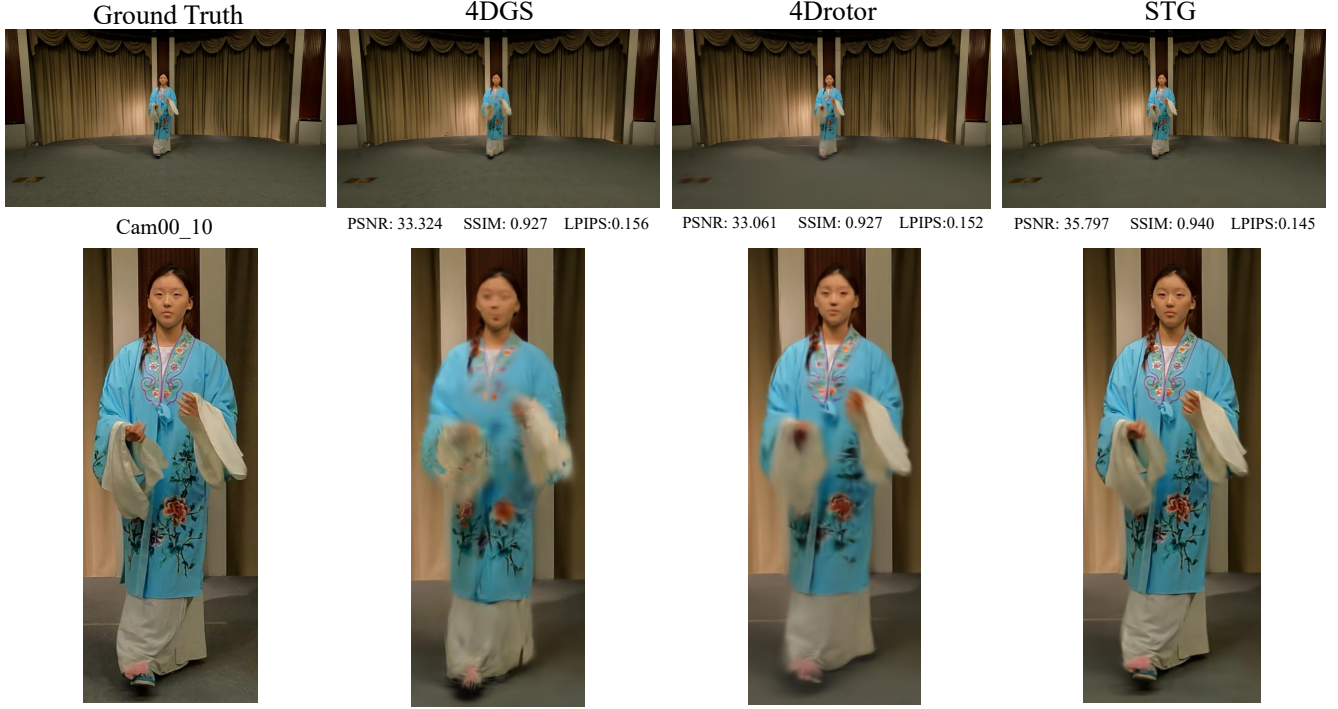

(a) The results of train views for three baselines on *Scene1 Opera-girl*.

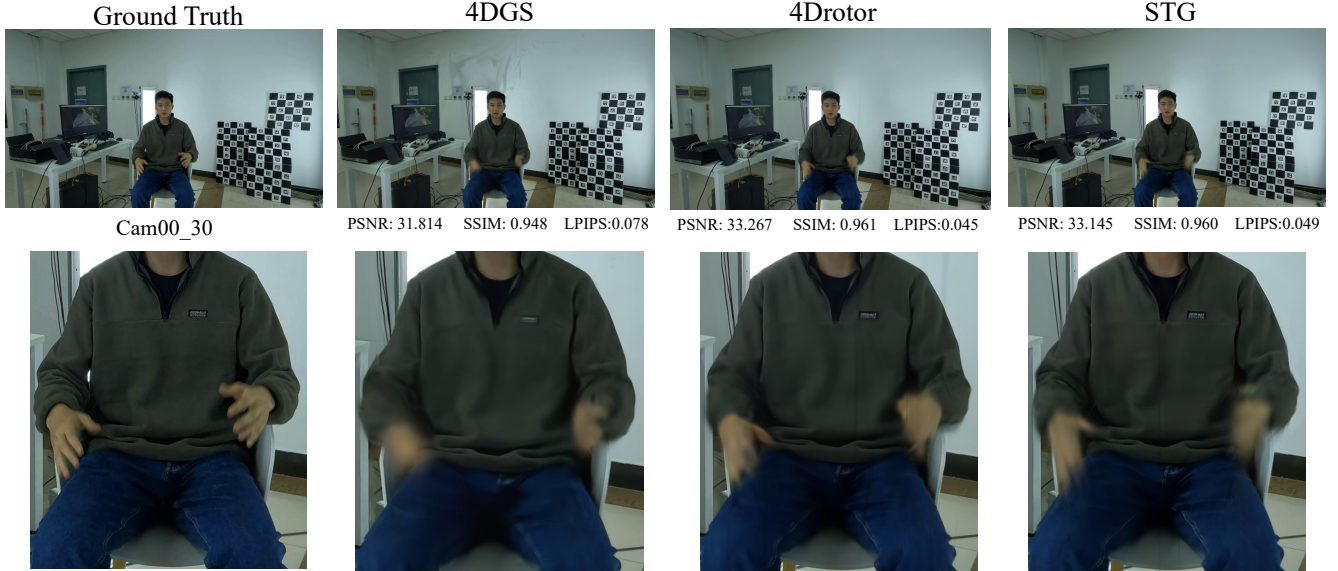

(b) The results of train views for three baselines on *Scene2 Laboratory*.

Figure 9. More benchmark results visualization (Part 1).

the ground truth as:

$$Loss = (1 - \lambda_1)L_1(gt, C'_i) + \lambda_1 D_{SSIM}(gt, C'_i) \quad (14)$$

You can get a more intuitive sense of the improvement from the video in supplementary materials.

## E. Clarifications and Technical Details.

### E.1. About "Volumetric" Term

In fact, both academia and industry have yet to provide a clear definition of volumetric video capture methods. Our



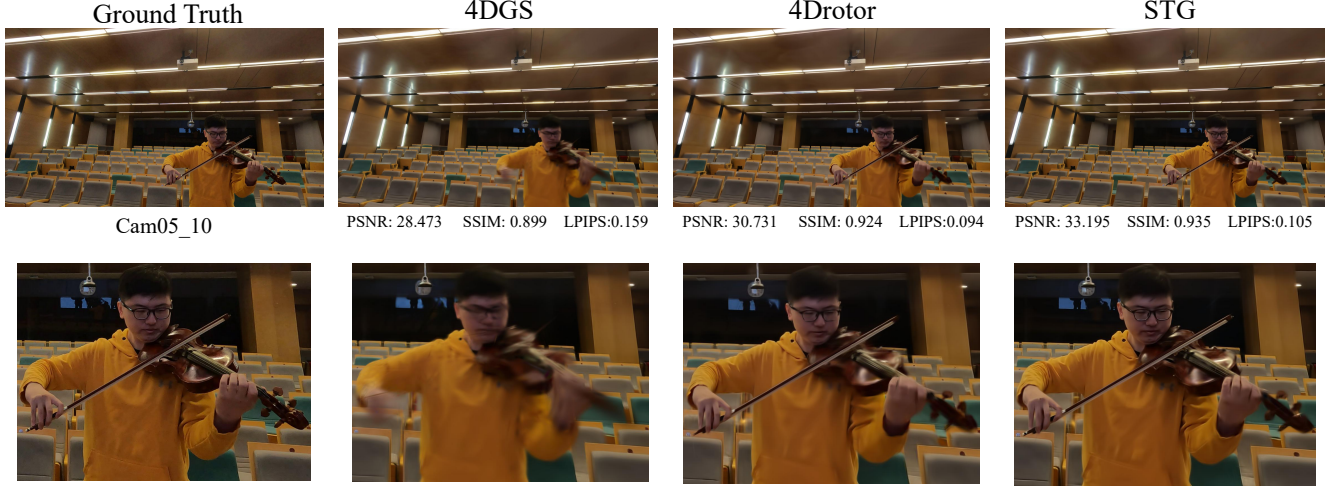

(c) The results of train views for three baselines on *Scene5 Rendition*.

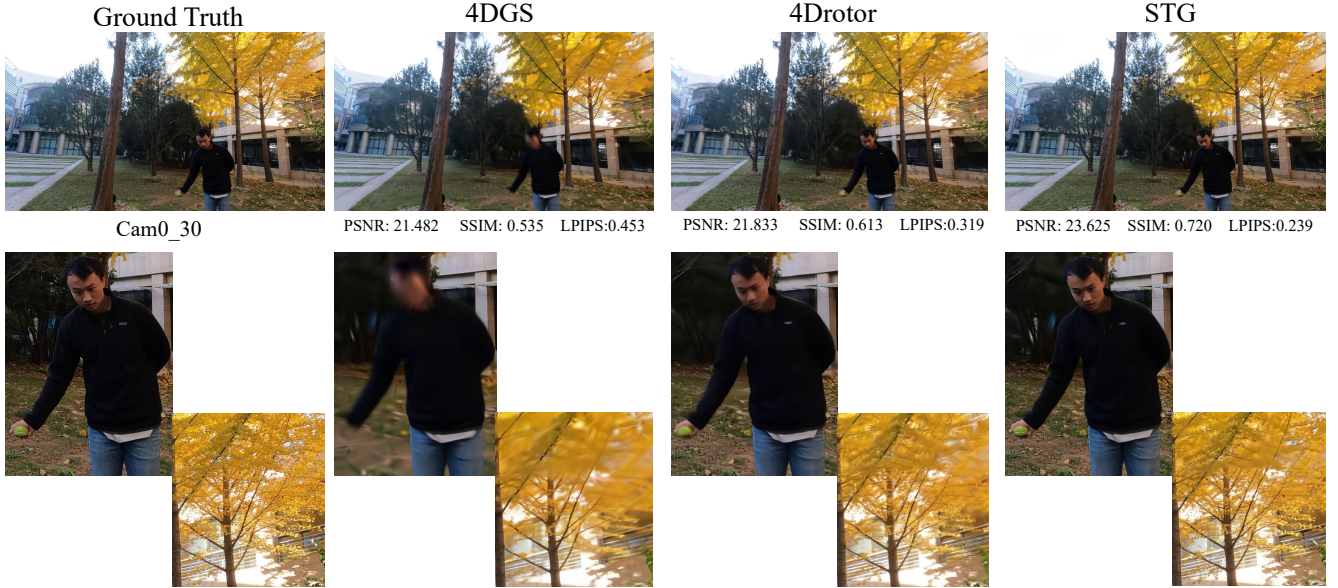

(d) The results of train views for three baselines on *Scene6 Puppy*.

Figure 9. More benchmark results visualization (Part 2).

original intention was to define videos that use 3D reconstruction technologies and provide a 6-DOF experience as volumetric video, which is the future of media. Most existing volumetric videos are constructed from an outside-looking-in manner, often lacking natural backgrounds and lighting, which reduces immersion. Inspired by Google’s work [6], we aim to develop videos offering a multi-modal, inside-looking-out 6-DoF experience, and thus call it “immersive volumetric video”.

## E.2. STG++ Limitations

We introduce viewpoint-based color transformation to address global color inconsistencies caused by varying lighting conditions between cameras in real-world scenes (see [supp.video 03:41](#)). However, local flickering remains a complex issue due to variations in materials and environmental lighting changes. It is still a significant challenge for the current community, requiring more adaptive and fine-grained processing. We will consider this in future work.



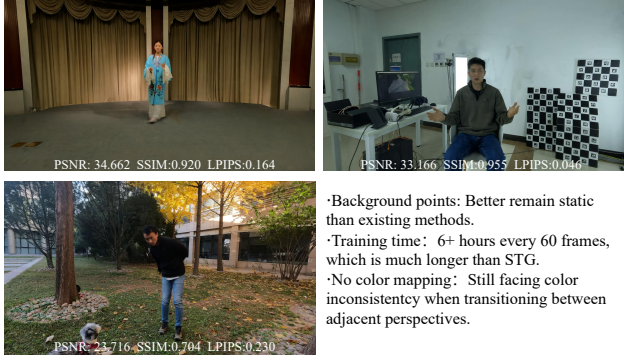

Figure 10. Ex4DGS’s performance on the same views as Figure 5 showed in the main text.

| Method                 | Direction Score | Distance Score |
|------------------------|-----------------|----------------|
| w/o SFR                | 1.17            | 1.67           |
| SFR+distance           | 1.69            | 3.02           |
| SFR+direction          | 3.81            | 3.03           |
| SFR+direction+distance | <b>3.91</b>     | <b>3.07</b>    |

Figure 11. Ablation Studies Illustrate the Effectiveness of Our Proposed Sound Field Reconstruction (SFR) Baseline. A total of 58 participants participated in the user study, rating their sense of direction and distance based on results from various algorithms, using a scale from 1 to 5 (1 being low and 5 being high).

### E.3. More Validation of Sound Field Reconstruction

It is worth noting that, AV-NeRF [31] is the closest existing work to our goal of sound field reconstruction (SFR), which means it also targets sound synthesis in a novel location. However, it focuses solely on sound synthesis and uses professional binaural audio acquisition equipment (which is entirely different from our capture system) to collect sound from various locations in space. As a result, its SFR method cannot directly leverage data collected by our camera rig. We will try to modify and adapt its approach for comparison with our baseline in the future.

But to further assess the effectiveness of each module in our proposed SFR method, we have conducted an ablation study based on user feedback, as shown in Figure 11. The average scores for both metrics indicate that incorporating direction and distance modeling in sound field reconstruction significantly enhances participants’ immersive video experiences, further demonstrating our SFR algorithm as a practical baseline.

### E.4. Capture Rig Setups and Calibration

**Time-Synchronized.** We used GoPro’s official QR control app on mobile phone, enabling each camera to scan a dynamically updating QR code for time synchronization.

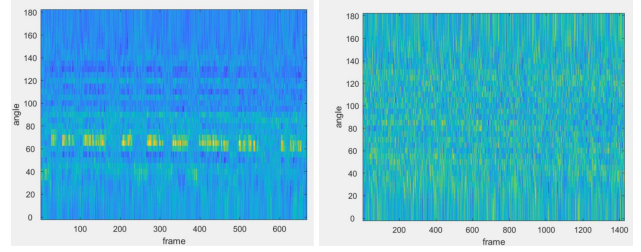

Figure 12. Sound Localization w & w/o Noise Reduction. The yellow areas in the image represent the highest sound intensity in each frame, clearly indicating the sound source’s angle change relative to a specific camera.

**Noise Reduction and Cart Speed.** Our cart only generates noise from axle rotation during sharp turns. The description in main text L.250-253 mitigates this noise and greatly reduces the impact of environmental sounds (e.g., wind) on sound quality. As shown in Figure 12, the denoised sound achieves clearer localization (left), while the noisy sound results in more divergent localization (right). This indicates that the sound quality we collected can not only construct multi-modal volumetric videos but also contribute to sound field, inspiring future work on sound localization and reconstruction from multiple sound sources. Additionally, while the cart experiences slight shaking on uneven terrain, it moves as a rigid body, so its speed is not limited. This prior knowledge can even accelerate our calibration process. The slow speed in this work is primarily due to safety considerations, and we plan to collect faster-moving data in the future.

**Calibration.** Although we have completed the calibration of the data intended for release, including both fixed-point and mobile shooting, before the submission deadline, it is important to note that, for moving shots, we have tested various open-source algorithms, but none offer an efficient solution for moving multi-view data. Using the original COLMAP takes days to calibrate poses for each frame in long videos. A feasible approach to speed up may refer to <sup>†</sup>. We also look forward to working with colleagues in this community to explore more efficient and accurate calibration solutions using this dataset.

### E.5. Continuously Updated Dataset

Currently, other segments in Scene1 include high-speed motions, as shown in Figure 13. And we will continue to update the dataset, increase its richness to make more contributions to the development of the community.

<sup>†</sup>Bernhard Kerbl et al. A Hierarchical 3D Gaussian Representation for Real-Time Rendering of Very Large Datasets. TOG, 2024.1

Table 6. Performance of three baseline methods and STG++ on the **ImViD** Dataset. All methods selected **cam10** as the test view.

| Method  | Scene1 Opera_girl |       |        | Scene2 Laboratory |       |        | Scene5 Violin |       |        | Scene6 Puppy |       |        |
|---------|-------------------|-------|--------|-------------------|-------|--------|---------------|-------|--------|--------------|-------|--------|
|         | PSNR↑             | SSIM↑ | LPIPS↓ | PSNR↑             | SSIM↑ | LPIPS↓ | PSNR↑         | SSIM↑ | LPIPS↓ | PSNR↑        | SSIM↑ | LPIPS↓ |
| 4DGS    | 23.227            | 0.753 | 0.410  | 25.798            | 0.889 | 0.176  | 26.586        | 0.842 | 0.356  | 18.121       | 0.222 | 0.711  |
| 4DRotor | 27.263            | 0.775 | 0.328  | 28.007            | 0.918 | 0.098  | 24.083        | 0.850 | 0.296  | 17.916       | 0.298 | 0.331  |
| STG     | 28.482            | 0.786 | 0.287  | 26.306            | 0.910 | 0.114  | 23.144        | 0.846 | 0.317  | 20.497       | 0.594 | 0.211  |
| STG++   | 31.240            | 0.799 | 0.277  | 27.581            | 0.916 | 0.107  | 25.747        | 0.834 | 0.310  | 20.533       | 0.598 | 0.202  |

Table 7. Comparison of average metrics for three baselines and STG++ across four scenes. Due to its smaller model size, 4DGS [55] can train 300 frames at once, so there are no segmented results.

|                   |         | Frames1-60 |       |        | Frames60-120 |       |        | Frames120-180 |       |        | Frames180-240 |       |        | Frames240-300 |       |        | Avarage |       |        |
|-------------------|---------|------------|-------|--------|--------------|-------|--------|---------------|-------|--------|---------------|-------|--------|---------------|-------|--------|---------|-------|--------|
|                   |         | PSNR↑      | SSIM↑ | LPIPS↓ | PSNR↑        | SSIM↑ | LPIPS↓ | PSNR↑         | SSIM↑ | LPIPS↓ | PSNR↑         | SSIM↑ | LPIPS↓ | PSNR↑         | SSIM↑ | LPIPS↓ | PSNR↑   | SSIM↑ | LPIPS↓ |
| Scene1 Opera      | 4DGS    | -          | -     | -      | -            | -     | -      | -             | -     | -      | -             | -     | -      | -             | -     | -      | 35.005  | 0.930 | 0.156  |
|                   | 4DRotor | 33.502     | 0.912 | 0.142  | 33.735       | 0.913 | 0.137  | 33.749        | 0.913 | 0.137  | 31.460        | 0.893 | 0.155  | 33.718        | 0.913 | 0.139  | 33.233  | 0.909 | 0.142  |
|                   | STG     | 34.915     | 0.920 | 0.127  | 35.343       | 0.922 | 0.125  | 35.478        | 0.924 | 0.124  | 35.496        | 0.922 | 0.125  | 34.913        | 0.921 | 0.126  | 35.229  | 0.922 | 0.125  |
|                   | STG++   | 35.195     | 0.922 | 0.125  | 35.603       | 0.923 | 0.123  | 35.822        | 0.924 | 0.122  | 35.738        | 0.924 | 0.123  | 35.738        | 0.925 | 0.123  | 35.619  | 0.924 | 0.123  |
| Scene2 Laboratory | 4DGS    | -          | -     | -      | -            | -     | -      | -             | -     | -      | -             | -     | -      | -             | -     | -      | 32.701  | 0.949 | 0.078  |
|                   | 4DRotor | 36.207     | 0.967 | 0.049  | 36.519       | 0.967 | 0.046  | 34.593        | 0.96  | 0.067  | 36.484        | 0.968 | 0.046  | 36.679        | 0.967 | 0.049  | 36.096  | 0.966 | 0.051  |
|                   | STG     | 33.405     | 0.949 | 0.077  | 33.257       | 0.949 | 0.078  | 33.641        | 0.951 | 0.077  | 33.140        | 0.948 | 0.081  | 33.298        | 0.950 | 0.078  | 33.348  | 0.949 | 0.078  |
|                   | STG++   | 33.450     | 0.950 | 0.079  | 33.666       | 0.951 | 0.076  | 33.616        | 0.951 | 0.077  | 33.452        | 0.950 | 0.079  | 33.748        | 0.952 | 0.073  | 33.586  | 0.951 | 0.076  |
| Scene5 Rendition  | 4DGS    | -          | -     | -      | -            | -     | -      | -             | -     | -      | -             | -     | -      | -             | -     | -      | 33.645  | 0.918 | 0.183  |
|                   | 4DRotor | 33.398     | 0.935 | 0.135  | 33.361       | 0.935 | 0.133  | 33.255        | 0.934 | 0.136  | 33.398        | 0.935 | 0.132  | 32.638        | 0.932 | 0.136  | 33.210  | 0.934 | 0.134  |
|                   | STG     | 34.508     | 0.930 | 0.158  | 34.029       | 0.929 | 0.161  | 33.900        | 0.928 | 0.165  | 34.178        | 0.929 | 0.163  | 34.222        | 0.929 | 0.161  | 34.167  | 0.929 | 0.162  |
|                   | STG++   | 34.426     | 0.928 | 0.160  | 34.277       | 0.929 | 0.163  | 34.169        | 0.928 | 0.165  | 34.407        | 0.929 | 0.161  | 34.203        | 0.927 | 0.159  | 34.296  | 0.928 | 0.162  |
| Scene6 Puppy      | 4DGS    | -          | -     | -      | -            | -     | -      | -             | -     | -      | -             | -     | -      | -             | -     | -      | 21.117  | 0.450 | 0.561  |
|                   | 4DRotor | 21.902     | 0.643 | 0.301  | 21.988       | 0.646 | 0.297  | 21.719        | 0.629 | 0.319  | 21.884        | 0.644 | 0.297  | 21.844        | 0.645 | 0.300  | 21.867  | 0.641 | 0.303  |
|                   | STG     | 23.307     | 0.714 | 0.247  | 23.381       | 0.717 | 0.243  | 23.387        | 0.718 | 0.241  | 23.331        | 0.717 | 0.245  | 23.413        | 0.718 | 0.241  | 23.364  | 0.716 | 0.243  |
|                   | STG++   | 23.316     | 0.714 | 0.246  | 23.423       | 0.719 | 0.240  | 23.392        | 0.719 | 0.241  | 23.314        | 0.716 | 0.246  | 23.438        | 0.719 | 0.240  | 23.377  | 0.717 | 0.242  |

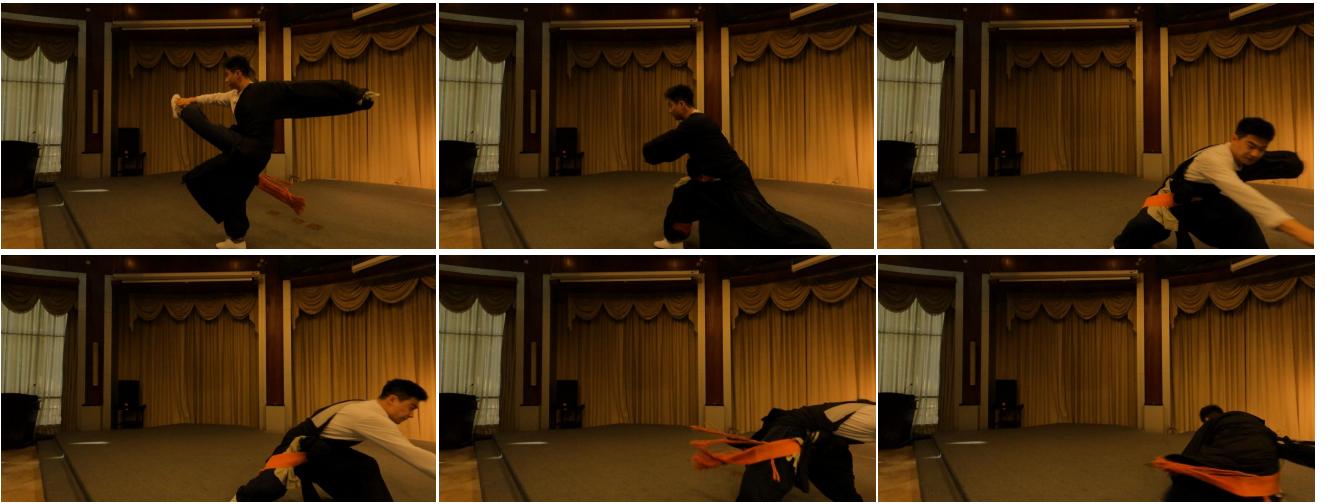

Figure 13. High-Speed Motions Data in Our Dataset ImViD. Scene 1: opera boy spinning kick.



Table 8. Existing real-world datasets for dynamic novel view synthesis.

| Datasets                                  | No.Scene | Outdoor/Indoor | Cameras                                | Mobility                   | Resolution | Angles           | Duration            | FPS   | Multimodality | Content                                                                                                                                                                                                                                                                                                                                                                                     |
|-------------------------------------------|----------|----------------|----------------------------------------|----------------------------|------------|------------------|---------------------|-------|---------------|---------------------------------------------------------------------------------------------------------------------------------------------------------------------------------------------------------------------------------------------------------------------------------------------------------------------------------------------------------------------------------------------|
| PanopticSports [19]                       | 65       | Indoor         | 480 cameras                            | Static                     | 640×480    | 360°             | 5mins               | 25    | ✗             | Human-centric actions                                                                                                                                                                                                                                                                                                                                                                       |
| Technicolor [46]                          | 12       | Indoor         | 16 cameras                             | Static                     | 2048×1088  | Frontal          | 2s                  | 30    | ✗             | Has a number of close-ups sequences, captured medium angle scenes and other animated scenes where the movement does not come from a human.                                                                                                                                                                                                                                                  |
| Immersive-Lightfield [6]                  | 15       | both           | 46 cameras                             | Static                     | 2560×1920  | Frontal          | 10-30s              | 30    | ✗             | Simple and slow motion of human, animals, objects                                                                                                                                                                                                                                                                                                                                           |
| HyperNeRF [43]                            | 17       | Indoor         | 1 hand-held phone                      | Fixed-point Waving         | 1920×1080  | Frontal          | 30-60s              | 30    | ✗             | Waving a mobile phone in front of a moving scene, object-centric                                                                                                                                                                                                                                                                                                                            |
| Dynamic Scene Datasets (NVIDIA) [60]      | 8        | Outdoor        | 1 Mobile phone /12 cameras             | Fixed-point Waving /Static | 1920×1080  | Frontal          | 5s                  | 60    | ✗             | Simple body motions (facial, jump, etc)                                                                                                                                                                                                                                                                                                                                                     |
| UCSD Dynamic [34]                         | 96       | Outdoor        | 10 cameras                             | Static                     | 1920×1080  | Frontal          | 1-2mins             | 120   | ✗             | Various visual effects and human interactions                                                                                                                                                                                                                                                                                                                                               |
| ZJU-Mocap [44]                            | 10       | Indoor         | 21 cameras                             | Static                     | 1024×1024  | 360°             | 20s                 | 50    | ✗             | Simple body motions (punch, kick, etc.)                                                                                                                                                                                                                                                                                                                                                     |
| Plenoptic Dataset (DyNeRF/Neural 3D) [28] | 6        | Indoor         | 21 cameras                             | Static                     | 2704×2028  | Frontal          | 10-30s              | 30    | ✗             | Contains high specularly, translucency and transparency objects, motions with changing topology, selfcast moving shadows, volumetric effects, various lighting conditions and multiple people moving around in open living room space                                                                                                                                                       |
| D2NeRF [56]                               | 10       | Indoor         | dual-hold phone                        | Fixed-point Waving         | 1920×1080  | Frontal          | 5s                  | 30    | ✗             | Contains more challenging scenarios with rapid motion and non-trivial dynamic shadows                                                                                                                                                                                                                                                                                                       |
| iPhone Datasets [15]                      | 14       | both           | 1 hand-held phone /2 cameras           | Fixed-point Waving /Static | 640×480    | Frontal          | 8-15s               | 30/60 | ✗             | Featuring non-repetitive motion, from various categories such as generic objects, humans, and pets                                                                                                                                                                                                                                                                                          |
| Meetroom Datasets [27]                    | 4        | Indoor         | 13 cameras                             | Static                     | 1280×720   | Frontal          | 10s                 | 30    | ✗             | One or three persons have discussion, working, trimming in a meeting room                                                                                                                                                                                                                                                                                                                   |
| ENeRF-Outdoor [33]                        | 4        | Outdoor        | 18 cameras                             | Static                     | 1920×1080  | Frontal          | 20-40s              | 30    | ✗             | Complex human motions                                                                                                                                                                                                                                                                                                                                                                       |
| Replay [49]                               | 46       | Indoor         | 12 cameras                             | Static                     | 3840×2160  | 360°             | 5mins               | 30    | ✓(Audio)      | Dancing, chatting, playing video games, unwrapping presents, playing ping pong                                                                                                                                                                                                                                                                                                              |
| Campus Datasets [54]                      | 6        | Outdoor        | 24 cameras                             | Static                     | 3840×2160  | Frontal          | 5-10s               | 30    | ✗             | Includes more realistic observations such as pedestrians, moving cars, and grasses with people playing                                                                                                                                                                                                                                                                                      |
| MoDGS [36]                                | 6        | both           | 1 cameras                              | Static                     | –          | Frontal          | –                   | –     | ✗             | Contains diverse subjects like skating, a dog eating food, YOGA, etc.                                                                                                                                                                                                                                                                                                                       |
| DiVa-360 [37]                             | 53       | Indoor         | 53 cameras                             | Static                     | 1280×720   | Frontal          | 51s                 | 120   | ✓(Audio)      | For Object-centric tasks. Contains dynamic objects and intricate hand-object interactions.                                                                                                                                                                                                                                                                                                  |
| NeRF On-the-go [45]                       | 12       | both           | 1 hand-held phone                      | Moveable                   | 4032×3024  | 360°             | 5-10s               | 30    | ✗             | Including 10 outdoor and 2 indoor scenes, features a wide range of dynamic objects including pedestrians, cyclists, strollers, toys, cars, robots, and trams), along with diverse occlusion ratios ranging from 5% to 30%                                                                                                                                                                   |
| 360+X [9]                                 | 28       | both           | 1 360°cameras and 1 Spectacles cameras | Static                     | 5760×2880  | 360°             | 10s (2152 sequence) | 30    | ✓(Audio)      | Capture in 17 cities across 5 countries. Panoptic perspective to scene understanding with audio                                                                                                                                                                                                                                                                                             |
| ImVID(Ours)                               | 7        | both           | 46 cameras                             | Moveable                   | 5312×2988  | Frontal and 360° | 1-5mins             | 60    | ✓(Audio)      | Seven common indoor and outdoor scenes in daily life, including opera, face-to-face communication, teaching, discussion, music performance, interaction with pets, and playing. Each scene has high-quality synchronized multi-view video and audio with a duration of more than 1 minute, and contains rich elements such as various small objects, glass, and changes in light and shadow |
